# Supplementary material for: ConDeTri - A Content Dependent Read Trimmer for Illumina Data
Source: PLOS journal article supplement (doi:10.1371/journal.pone.0026314), 2011-10-19

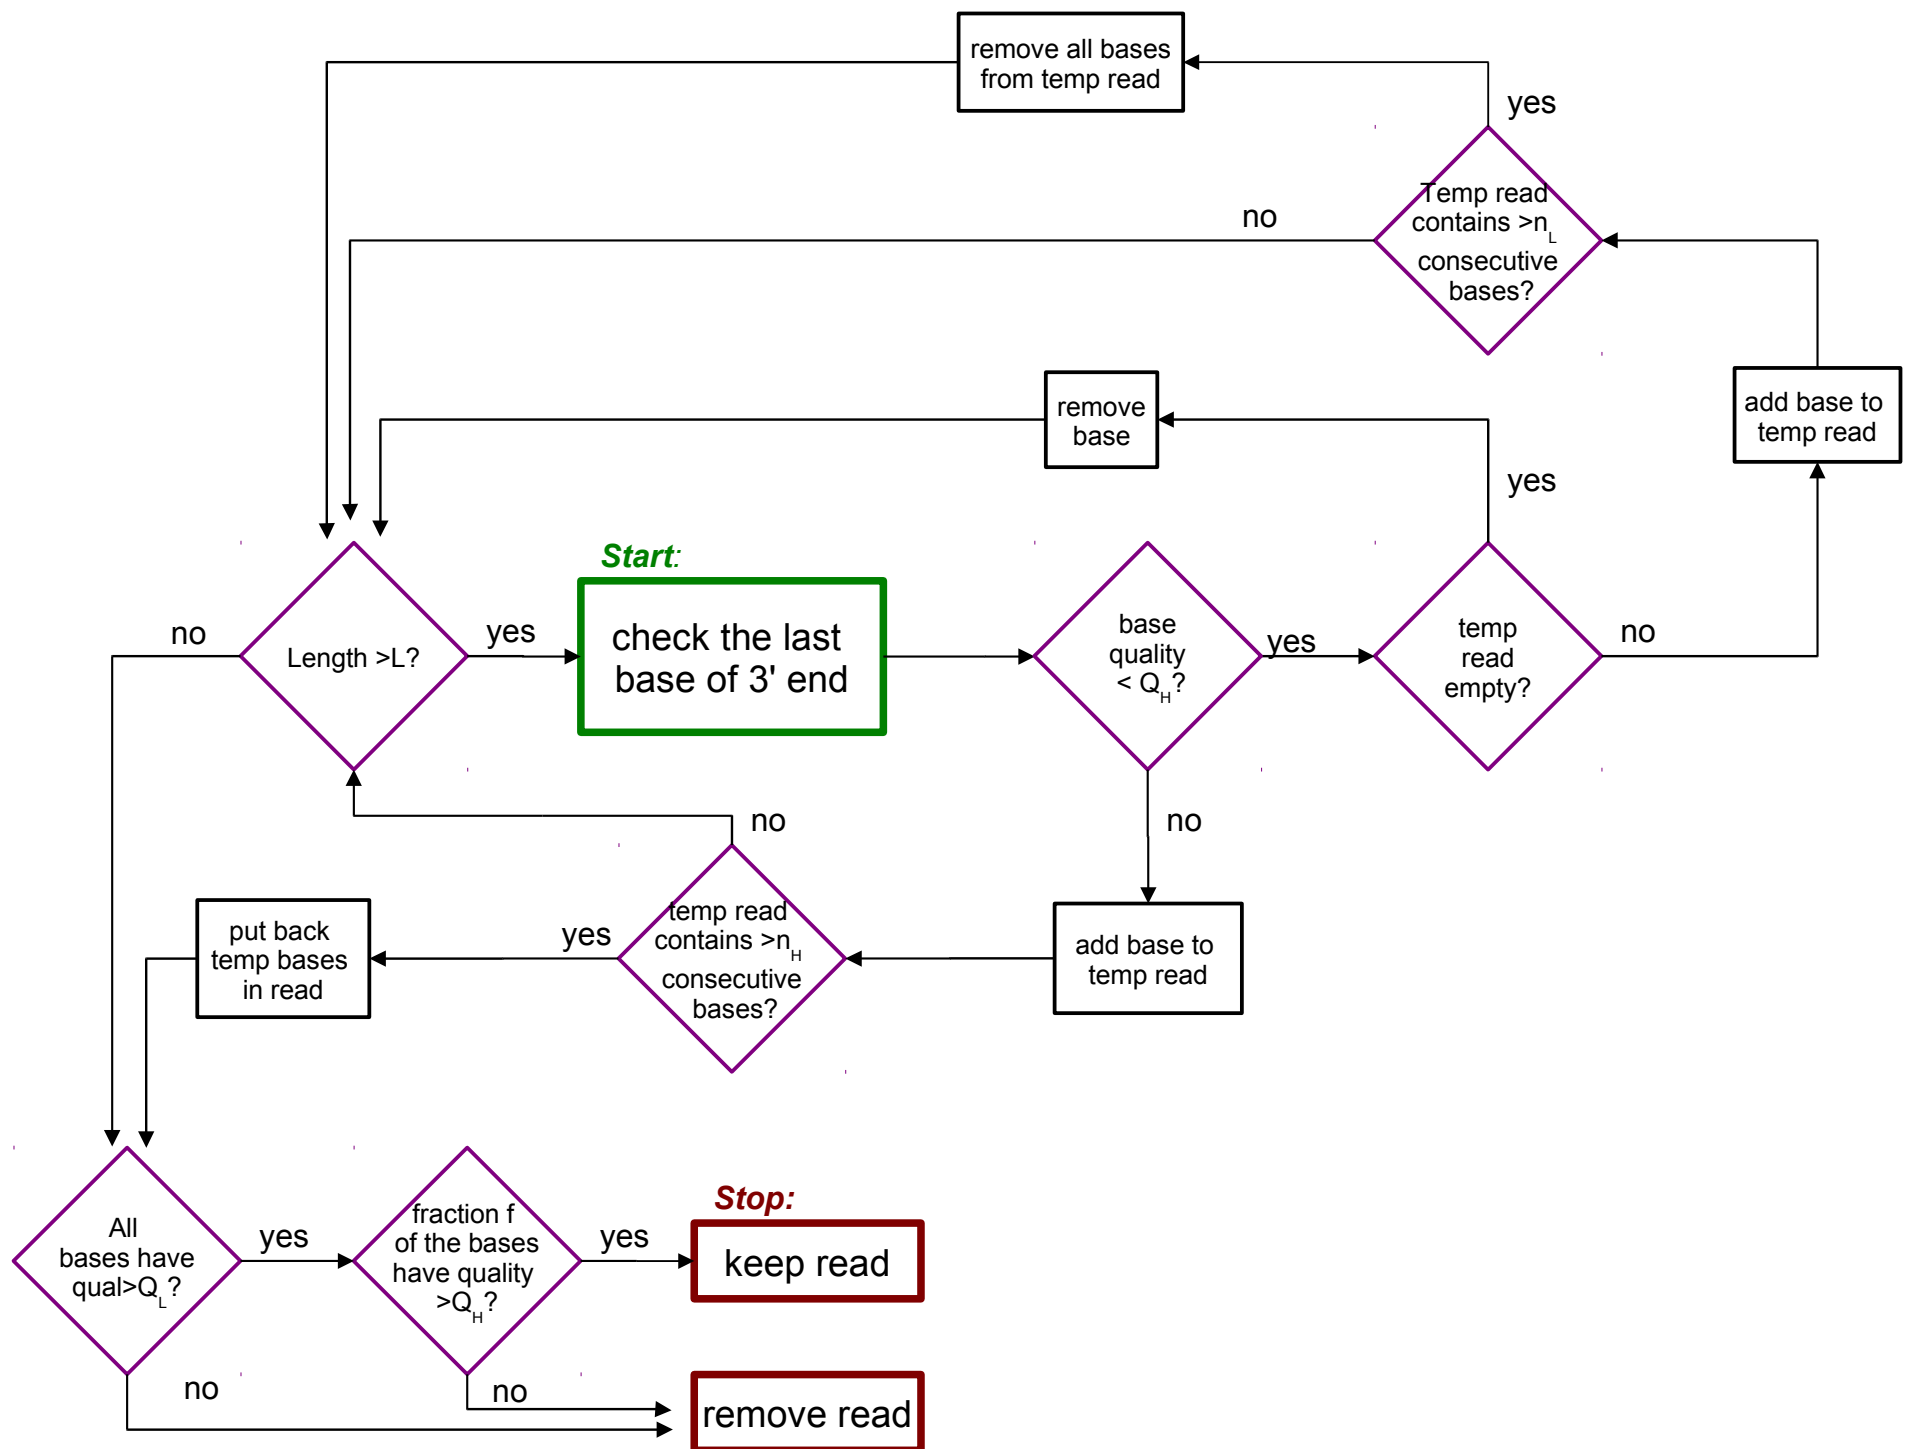

Supplement: S1 (10.1371/journal.pone.0026314.s001) [file journal.pone.0026314.s001]
