# Supplementary material for: ConDeTri - A Content Dependent Read Trimmer for Illumina Data
Source: PLOS journal article supplement (doi:10.1371/journal.pone.0026314), 2011-10-19
Supplement: S2 (10.1371/journal.pone.0026314.s002) [file journal.pone.0026314.s002]

## Example 1: Good quality read

■ Base with quality  $>Q_H$

■ Base with quality  $<Q_H$

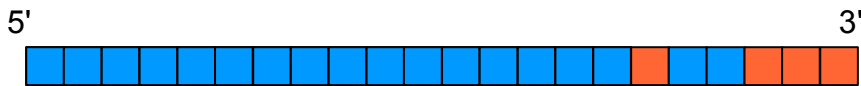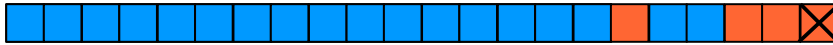

*Trim bases with quality less than  $Q_H$*

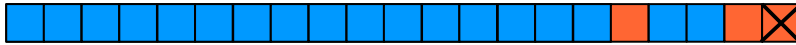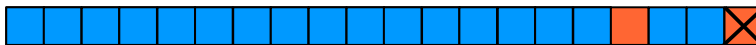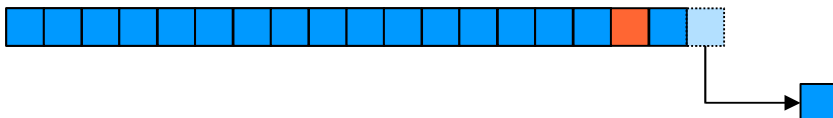

*Save high quality bases temporarily*

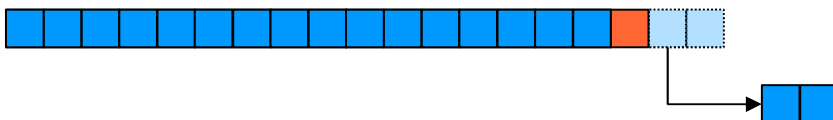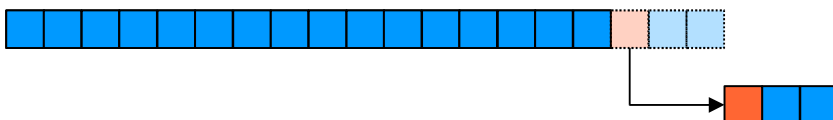

*Up to  $n_L$  consecutive low quality bases can also be saved temporarily*

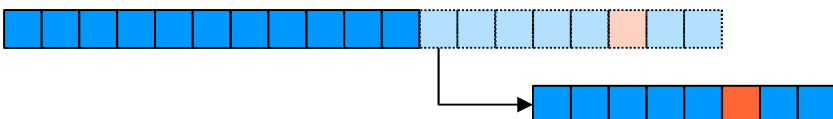

*When  $n_H$  consecutive bases are found the trimming is terminated*

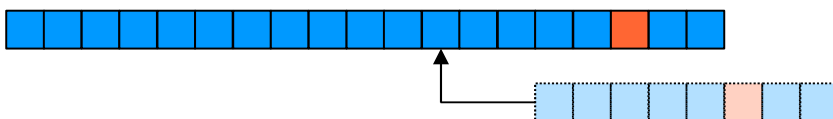

*Temporarily saved bases are added back to the read.*

## Example 2: Poor quality read

- Base with quality  $> Q_H$
- Base with quality  $< Q_H$

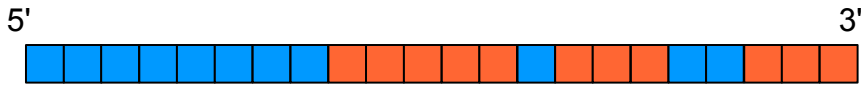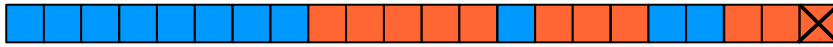

Trim bases  
with quality  
less than  $Q_H$

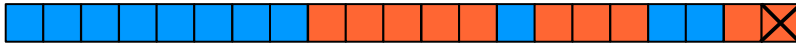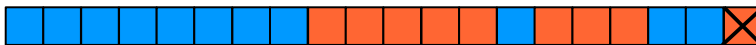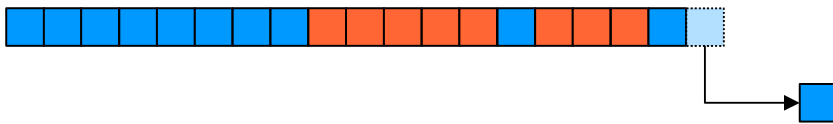

Save high  
quality bases  
temporarily

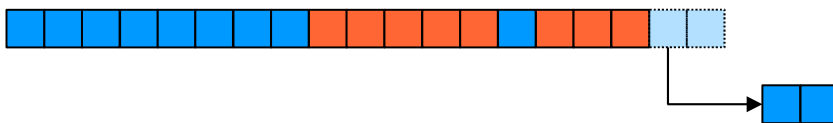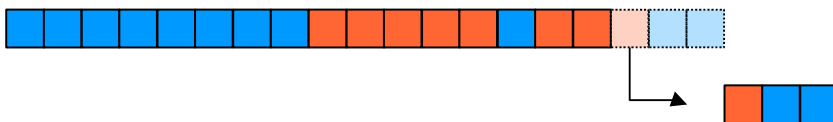

More than  $n_L$   
consecutive low  
quality bases –  
remove temporarily  
saved bases

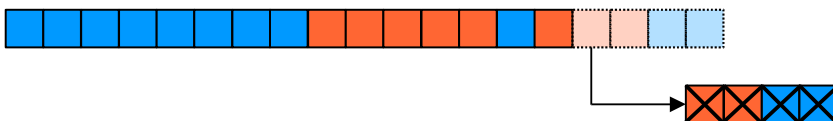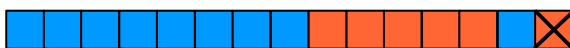

Start the process  
over again

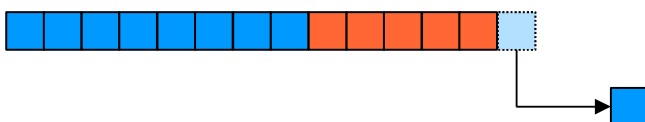

Continue either until  
finding  $n_H$  consecutive  
bases, or the length of  
the read reaches  $L$
